# Supplementary material for: Testing Quantitative and Qualitative Sex Effects in a National Swedish Twin-Sibling Study of Posttraumatic Stress Disorder
Source: Atypon-hosted journal article supplement (doi:10.1176/appi.ajp.20230104), 2024-06-04
Supplement: appi.ajp.20230104.ds001.pdf [file appi.ajp.20230104.ds001.pdf]

We had medical diagnosis from Primary Health Care clinics from the counties throughout Sweden; Blekinge (2009 - 2016), Dalarna (2005 - 2013), Värmland (2005 - 2015), Kalmar Län (2007 - 2016), Sörmland (1992 - 2017), Uppsala Län (2005 - 2015), Västernorrland (2008 - 2015) Norrbotten Län (2001 - 2014), Gävleborg (2010 - 2017), Gotland (2011 - 2018), Halland (2007 - 2014), Jönköpings Län (2008 - 2014), Kronoberg (2006 - 2016), Skåne (1989 - 2018), Västerbotten (1992- 2018), Östergötland (1990 - 2014), Stockholms Län (2003 - 2016), and Västra Götaland (2000 - 2013).

**TABLE S1. Sensitivity model-fitting results in full sample**

| Model | Description            | -2logL    | # of Parameters | AIC       | Diff in AIC | p-value (LR-test) |
|-------|------------------------|-----------|-----------------|-----------|-------------|-------------------|
| 1     | $r_g$ free, $r_c$ free | 734,242.5 | 14              | 734,270.5 |             |                   |
| 2s    | $r_g$ free, $r_c = 0$  | 734,242.5 | 13              | 734,268.5 | -2          | 0.999             |
| 3s    | $r_g = 0$ , $r_c$ free | 734,258.6 | 13              | 734,284.6 | 14.1        | <0.0001           |
| 4s    | $r_g = 0$ , $r_c = 0$  | 734,948.0 | 12              | 734,972.0 | 701.5       | <0.0001           |

Notes: genetic correlation ( $r_g$ ), shared environment correlation ( $r_c$ ), Negative Two Log Likelihood (-2logL), Akaike Information Criterion (AIC), difference in AIC (Diff), likelihood-ratio (LR).

**TABLE S2. Parameter estimates from the full model**

| <i>Parameter</i>                         | <i>Estimate (SE)</i> |
|------------------------------------------|----------------------|
| Threshold MZ/DZ, same-sex pairs males    | 1.31 (0.02)          |
| Threshold DZ, opposite-sex pairs males   | 1.31 (0.02)          |
| Threshold MZ/DZ, same-sex pairs females  | 0.75 (0.01)          |
| Threshold DZ, opposite-sex pairs females | 0.74 (0.02)          |
| Slope (by year) males                    | 0.16 (0.01)          |
| Slope (by year) females                  | 0.24 (0.01)          |
| $a_m$                                    | 0.53 (0.01)          |
| $a_f$                                    | 0.60 (0.01)          |
| $r_g$                                    | 0.81 (0.04)          |

Notes: monozygotic (MZ), dizygotic (DZ), additive genetic male ( $a_m$ ), additive genetic female ( $a_f$ ), genetic correlation ( $r_g$ ).

**FIGURE S1. Graphical illustration of the variance components in all twin and full sibling pairs in the full theoretical model**

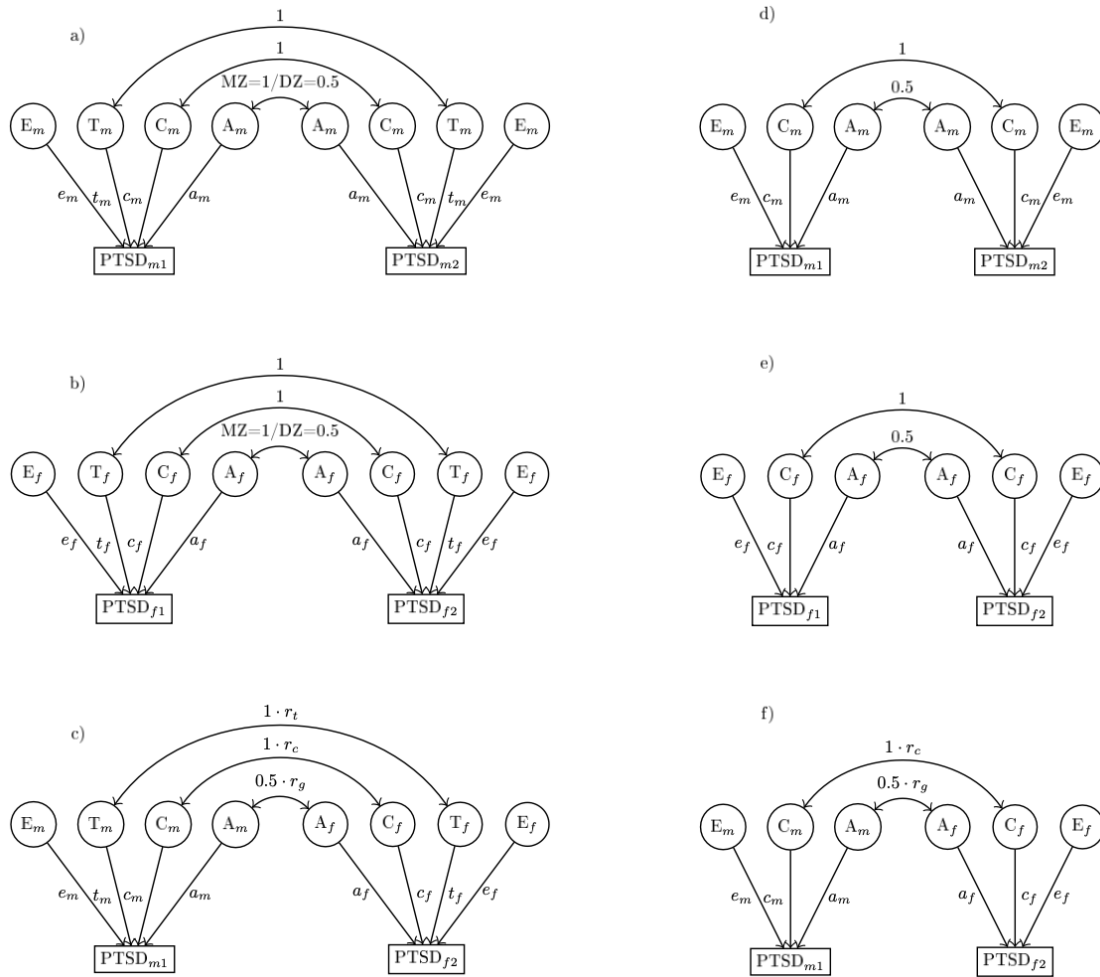

Notes: An ACTE model with qualitative and quantitative gender differences. a) Male-male MZ/DZ pairs. b) Female-female MZ/DZ pairs. c) Male-female DZ pairs. d) Male-male full sibling pairs. e) Female-female full sibling pairs. f) Male-female full sibling pairs. Posttraumatic stress disorder (PTSD), male (m), female (f), unique environment (E), twin specific environment (T), shared environment (C), additive genetic (A), genetic correlation ( $r_g$ ), shared environment correlation ( $r_c$ ).

**FIGURE S2. Graphical illustration of the variance components in the same-sex model**

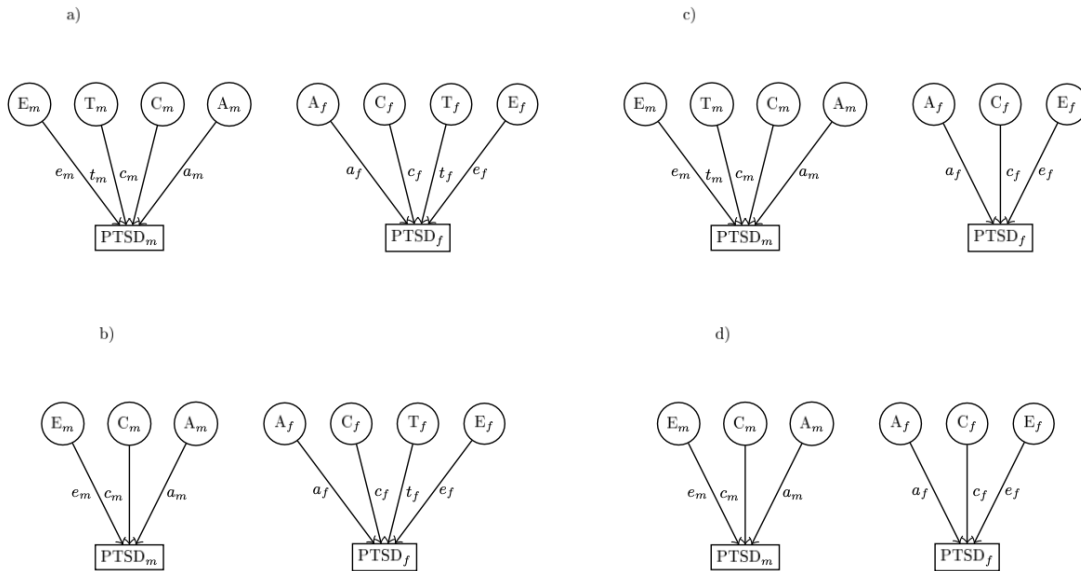

Notes: a) All variance components (ACTE model) b) Dropping T<sub>m</sub>. c) Dropping T<sub>f</sub>. d) Dropping T<sub>m</sub> and T<sub>f</sub>. Posttraumatic stress disorder (PTSD), male (m), female (f), unique environment (E), twin specific environment (T), shared environment (C), additive genetic (A).

**FIGURE S3. Graphical illustration of the variance components in selected opposite-sex pairs**

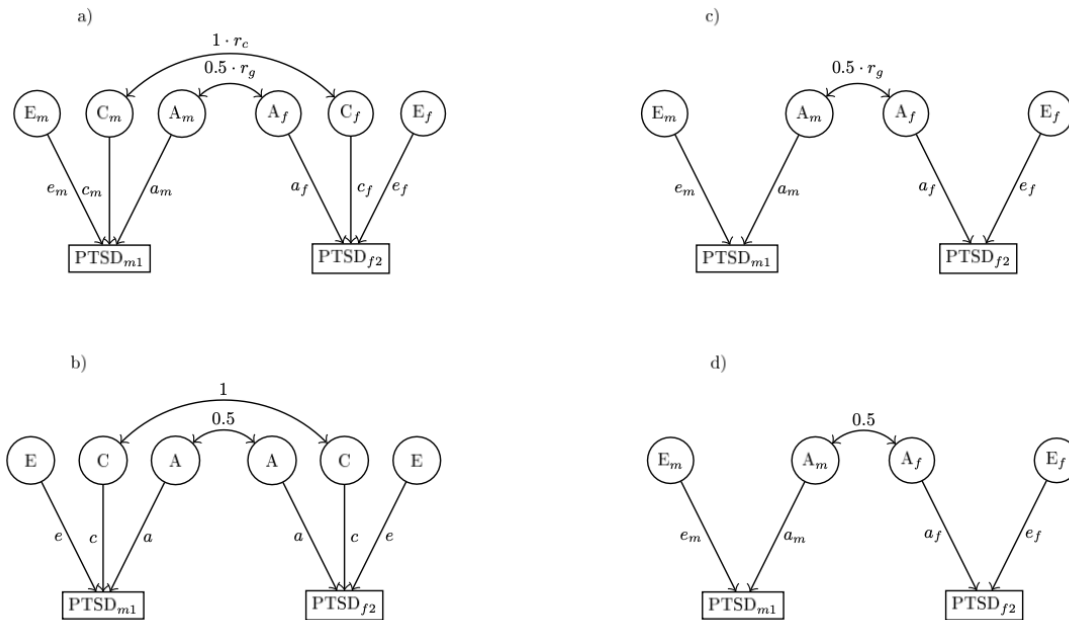

Notes: a) Qualitative and qualitative genetic and home environment differences, both  $r_g$  and  $r_c$  free (ACE model). b) No qualitative genetic nor home environment differences, both  $r_g$  and  $r_c$  are equated to unity, no quantitative gender differences (ACE model). c) Dropping  $C_m$  and  $C_f$  and allowing for qualitative genetic differences,  $r_g$  free (AE model). d) Dropping  $C_m$  and  $C_f$ , no qualitative genetic differences, equating  $r_g$  to unity (AE model). Posttraumatic stress disorder (PTSD), male (m), female (f), unique environment (E), shared environment (C), additive genetic (A), genetic correlation ( $r_g$ ), shared environment correlation ( $r_c$ ).

**FIGURE S4. Estimated risk of PTSD by group and birth year for the best-fit model**

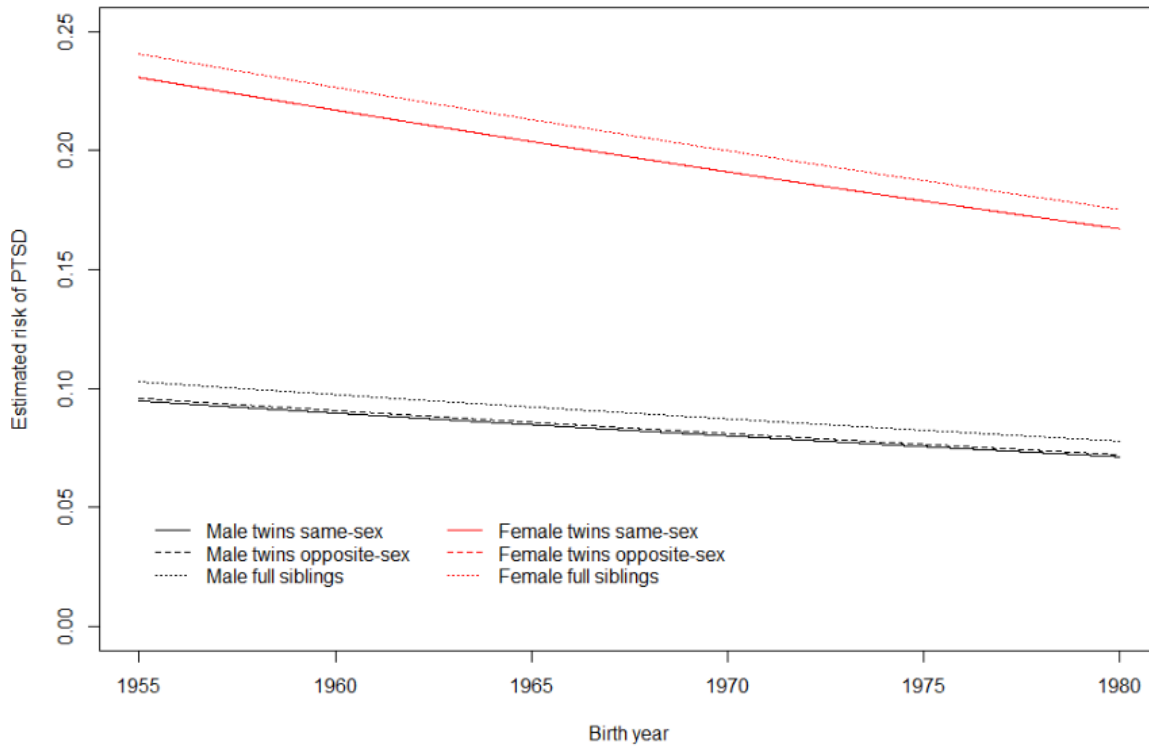

Note: Posttraumatic stress disorder (PTSD).
